1 **A negative feedback mechanism in the insulin-regulated glucose homeostasis in**  
2 **Japanese flounder *Paralichthys olivaceus* by two ways of glucose administration**

3

4 Dong Liu, Dongdong Han, Benyue Guo, Kangyu Deng, Zhixiang Gu, Mengxi Yang,  
5 Wei Xu, Wenbing Zhang\*, Kangsen Mai

6

7 *The Key Laboratory of Mariculture, Ministry of Education; The Key Laboratory of*  
8 *Aquaculture Nutrition and Feeds, Ministry of Agriculture; Ocean University of China,*  
9 *Qingdao 266003, China.*

10

11 **\*Corresponding author:**

12 Wenbing Zhang

13 Telephone: +86-532-82032145

14 Fax: +86-532-82032145

15 E-mail address: [wzhang@ouc.edu.cn](mailto:wzhang@ouc.edu.cn)

16

17

List of symbols and abbreviations

|         |                                                    |
|---------|----------------------------------------------------|
| IP      | intraperitoneal                                    |
| OR      | oral                                               |
| Pro-SS  | prosomatostatin                                    |
| Pro-CCK | cholecystokinin precursor                          |
| Pro-OX  | orexin precursor                                   |
| OX      | orexin                                             |
| NPY     | neuropeptide Y                                     |
| Pro-VIP | preprovasoactive intestinal peptide                |
| VIP     | vasoactive intestinal peptide                      |
| PACAP   | pituitary adenylate cyclase activating polypeptide |
| GK      | glucokinase                                        |
| FBPase  | fructose-1,6-bisphosphatase                        |
| PBS     | phosphate buffer solution                          |
| qPCR    | quantitative RT-PCR                                |

18

19

20 **Abstract:**

21 The present study comparatively analyzed the blood glucose and insulin concentration,  
22 the temporal and spatial expression of brain-gut peptides and the key enzymes of  
23 glycolysis and gluconeogenesis in Japanese flounder by intraperitoneal (IP) injection  
24 and oral (OR) administration of glucose. Samples were collected at 0, 1, 3, 5, 7, 9, 12,  
25 24 and 48h after IP and OR, respectively. Results showed that the hyperglycemia lasted  
26 5 hours and 21 hours in OR and IP group, respectively. The serum insulin  
27 concentration significantly decreased ( $1.58 \pm 0.21$  mIU/L) at 3h after IP glucose.  
28 However, it significantly increased at 3h ( $3.37 \pm 0.34$  mIU/L) after OR glucose. The  
29 gene expressions of prosomatostatin, neuropeptide Y, cholecystokinin precursor and  
30 orexin precursor in the brain showed different profiles between the OR and IP group.  
31 The OR not IP administration of glucose had significant effects on the gene  
32 expressions of preprovasoactive intestinal peptide, pituitary adenylate cyclase  
33 activating polypeptide and gastrin in the intestine. When the blood glucose  
34 concentration peaked in both IP and OR group, the glucokinase expression in liver was  
35 stimulated, but the expression of fructose-1,6-bisphosphatase was depressed. In  
36 conclusion, brain-gut peptides were confirmed in the present study. And the serum  
37 insulin and the brain-gut peptides have different responses between the IP and OR  
38 administration of glucose. A negative feedback mechanism in the insulin-regulated  
39 glucose homeostasis was suggested in Japanese flounder. Furthermore, this regulation  
40 could be conducted by activating PI<sub>3</sub>k-Akt, and then lead to the pathway downstream  
41 changes in glycolysis and gluconeogenesis.

42

43 **Keywords:** glucose; insulin; brain-gut peptides; *Paralichthys olivaceus*

44

45

46 **1. Introduction**

47 Glucose acts as an important source of energy for most species of fish. However,  
48 carnivorous fish species like rainbow trout have been considered as “glucose intolerant”  
49 as hyperglycemia after a glucose load can last for several hours, even more than one

50 day due to their limited ability in using glucose efficiently (Aguilar, Conde-Sieira et al.  
51 2010). They rely more on lipid and protein for energy purposes. Fish has an oxygen  
52 consumption rate one-tenth that of mammals. It was also found that the ability of  
53 insulin secretion stimulating by dietary amino acids is stronger than that of glucose  
54 (Mommsen and Plisetskaya 1991). Meanwhile, the ability of glucose phosphorylation  
55 and glucose transport is weak in fish (Cowey and Walton 1989).

56 Although glucose is not the main energy substrate for carnivorous fish species,  
57 glucose metabolism is important for the function of specific tissues in fish, such as  
58 brain (Soengas and Aldegunde 2002). The brain has the highest glucose utilization  
59 rates per unit mass in all tissues examined in rainbow trout (Washburn, Bruss et al.  
60 1992). In mammals, the brain is responsible for neuroregulation, meanwhile, gut cells  
61 perceive nutrients. The brain and gut have complicated connections in nutrients,  
62 hormone as well as nerve, thus a gut–brain axis has been generated (Romijn, Corssmit  
63 et al. 2008). Pearse and Takor (Pearse and Takor 1979) pointed out that gastrointestinal  
64 peptide secreting cells and peptidergic neurons in the brain is common in  
65 embryogenesis originated from the neuroectoderm. Some researches put forward the  
66 concept of enteric nervous system, and it has close ties to brain systems (Wood 1996).  
67 As the discovery of brain-gut peptides, researchers come up with the hypothesis of  
68 brain-intestinal connection (Zhang 2001). Although the function of the gut–brain axis  
69 is not completely understood yet in fish, the brain-peptides like gastrin (Pereira, Costa  
70 et al. 2015), cholecystokinin (Polakof, Míguez et al. 2011) and somatostatin (SS)  
71 (Sheridan, Plisetskaya et al. 1987) has been demonstrated to play a crucial role in  
72 glucose homeostasis.

73 Somatostatin promotes glycogen breakdown and the release of glucose from liver  
74 to plasma (Eilertson, O'connor et al. 1991). And it can also inhibit hormones secretion,  
75 including insulin (Sheridan, Plisetskaya et al. 1987, Eilertson and Sheridan 1993, Very,  
76 Knutson et al. 2001). Neuropeptide Y (NPY) is also involved in regulating insulin and  
77 glucose metabolism in fish. It was found that plasma insulin levels decreased in fasted  
78 European sea bass co-injected with NPY plus glucose, but remained stable when NPY  
79 was administrated alone to fed and fasted animals (Cerdá-Reverter, Sorbera et al.

80 1999). Mammalian studies showed that cholecystokinin (CCK) can stimulate insulin  
81 secretion and it can also make influence on  $\beta$  cell proliferation (May, Liu et al. 2016).  
82 The CCK promotes the transport of insulin into the central nervous system (CNS) of  
83 rats (Hermansen 1984). The Orexin (OX) is involved in glucose and lipid metabolism  
84 in mammals. Oerxin-A can promote insulin secretion, and it also enhances the capacity  
85 of glucose stimulated insulin (Park, Shim et al. 2015). In addition, the function of  
86 vasoactive intestinal peptide (VIP) and pituitary adenylate cyclase activating  
87 polypeptide (PACAP) are very similar. It mainly manifested in animal reproduction,  
88 nutrient digestion and energy balance. It deserves to be mentioned that these two  
89 hormones can stimulate insulin secretion (Bredkjoer, Palle et al. 1997, Vaudry,  
90 Gonzalez et al. 2000). Gastrin has the similar function to VIP/PACAP in glucose  
91 metabolism, and it can also stimulate insulin production (ShuangmingYue 2007). In  
92 regard to the glucose metabolism in mammals, the relationship between the  
93 hormones mentioned above was reviewed in Figure 1. However, little related  
94 information was reported in fish.

95 Japanese flounder *Paralichthys olivaceus* is a typical carnivorous fish species.  
96 The aim of the present study is to preliminarily investigate the brain-gut connection,  
97 and the roles of insulin and the related hormones in regulation of the glucose  
98 homeostasis in Japanese flounder loaded glucose by oral administration and  
99 intraperitoneal injection.

100

## 101 **2. Materials and Methods**

### 102 2.1. Experimental animals

103 Japanese flounders (body weight:  $225 \pm 50$  g) were provided by a local fish farm in  
104 Haiyang, Shangdong Province, China. They were randomly distributed into cylindrical  
105 fiberglass tanks (300-L) in a re-circulating water system. During the 4-week  
106 acclimation, Japanese flounders were fed with commercial feeds (Qingdao Great  
107 Bio-tech Co., Ltd) to satiation twice daily. All animal care and handling procedures  
108 were approved by the Animal Care Committee of Ocean University of China.

### 109 2.2. Intraperitoneal injection

110 There were two intraperitoneal injection (IP) groups. The one was IP injected with  
111 phosphate buffer solution (PBS), and the other one was with glucose. There were eight  
112 tanks per injection group, and eight fish per tank. Before injection, Japanese flounders  
113 were fasted for 48 hours to eliminate the effect of residual food in the digestive tract,  
114 and then were anaesthetized with MS-222 (50mg l<sup>-1</sup>). After being weighed, fish were  
115 IP injected with 2 ml glucose/kg body weight. The glucose was purchased from Sigma  
116 (500mg/ml, Sigma, USA). Meanwhile, the other group of animal was injected with the  
117 same volume PBS (0.01mol/L) as administration glucose group. The operations of  
118 injection for each tank were completed within 5 minutes. After injection, Japanese  
119 flounders were put back into the tanks. Samples of blood, brain, intestinal and liver  
120 were collected just before (time 0h) and 1 h, 3 h, 5 h, 7 h, 9 h, 12 h, 24 h and 48 h after  
121 injection. Blood was collected by 1ml syringes from caudal vein. Serum was obtained  
122 after centrifugation (10,000g for 10 min at 4 °C) of blood that allow to stay overnight  
123 at 4 °C. All samples were frozen in liquid nitrogen immediately and stored at -80 °C.

#### 124 2.3. Oral administration

125 There were two oral administration groups, and eight tanks per group, eight fish  
126 per tank. The one group received glucose (500mg/ml, Sigma, USA) with 3.34ml/Kg  
127 body mass. The other group received the same volume of PBS (0.01mol/L) and was  
128 used as the control. After oral (OR) administration, Japanese flounders were put back  
129 into the tanks. Samples of blood, brain, intestinal and liver were collected just before  
130 (time 0h), and 1 h, 3 h, 5 h, 7 h, 9 h, 12 h, 24 h and 48 h after OR. These samples were  
131 collected and stored as described above.

#### 132 2.4. Analysis of glucose and insulin concentrations in serum

133 Concentration of glucose in serum was determined with the automatic  
134 biochemical analyzer (Hitachi, 7600-210, Japan). Concentration of insulin in serum  
135 was analyzed with commercial kits (Nanjing Jiancheng Bioengineering Institute,  
136 Nanjing, China).

#### 137 2.5. Analysis of glycogen contents

138 The glycogen concentrations in liver were determined using the anthrone  
139 chromogenic method with commercial kits (Nanjing Jiancheng Bioengineering

140 Institute, Nanjing, China). They were measured with the UV spectrophotometer  
141 (UV-2401PC, Shimadzu, Kyoto, Japan).

## 142 2.6. Tissue distribution of the selected brain-gut peptides

143 Tissue distributions of the selected brain gut peptides were detected in stomach,  
144 gill, spleen, muscle, brain, liver, kidney, intestine and eye by semi-quantitative  
145 RT-PCR. Specific primers for peptides and  $\beta$ -actin (reference gene) were shown in  
146 Table 1. Isolation of the total RNA and synthesis of the first strand cDNA were carried  
147 out following the instructions of the kit (Trizol and PrimeScript Reverse Transcriptase,  
148 Takara, Japan). The PCR reaction system consisted of 1 $\mu$ l of cDNA, 12.5 $\mu$ l 2 $\times$   
149 EsTaqMsterMix (CWbiotech, China), 9.5 $\mu$ l of EDPC water and 1 $\mu$ l of each primer  
150 (10 $\mu$ M). The PCR amplification program is pre-denatured at 94 °C for 5 min, followed  
151 by 30 cycles of denaturation at 94 °C for 30s, annealing at 58 °C for 30 s, extension at  
152 72 °C for 1 min 30 s and post-extension at 72 °C for 5 min. PCR products were  
153 selected by 1.2% agarose gel electrophoresis.

## 154 2.7. Gene expression analysis by real-time quantitative RT-PCR

155 Gene expression levels were determined by real-time quantitative RT-PCR  
156 (q-PCR) using the iCycler iQ™ (Bio-Rad, Hercules, CA, USA). Analyses were using  
157 SYBR Green I (CWbiotech, China) according to the manufacturer's instructions. The  
158 total reaction volume was 25 $\mu$ l, including 1.0 $\mu$ l cDNA, 12.5 $\mu$ l 2 $\times$  UltraSYBR Mixture,  
159 1 $\mu$ l each of gene-specific primer (10 $\mu$ M, Table2) and 9.5 $\mu$ l DEPC water. Thermal  
160 cycling was initiated with incubation at 95 °C for 10min using hot-start iTaq™ DNA  
161 polymerase activation, 40steps of PCR were performed, each one consisting of heating  
162 at 95 °C, 10s for denaturing, and at specific annealing and extension temperatures is  
163 T<sub>m</sub> for 30s, 72 °C for 32s. Following the final PCR cycle, melting curves were  
164 systematically monitored (58 °C temperature gradient at 0.5 °C/s from 58 to 95 °C) to  
165 ensure that only one fragment was amplified. Relative quantification of the target gene  
166 transcript was done using  $\beta$ -actin gene expression as reference (Olsvik, Lie et al. 2005)  
167 which was stably expressed in this experiment. Samples without reverse transcriptase  
168 and samples without RNA were run for each reaction as negative controls. Relative  
169 quantification of the genes were calculated using " $2^{-\Delta\Delta C_t}$ " meth (Livak and Schmittgen

170 2001) with  $\beta$ -actin as reference gene. All real-time Q-PCR was performed in triplicate  
171 biological replicates.

172 The effects of glucose administration on the expression of hormone (peptides)  
173 genes were detected by comparing the 0, 1, 3, 5, 7, and 24 h after intraperitoneal  
174 injection and oral glucose administration, respectively. Hepatic glucose  
175 metabolism-related genes were analyzed by comparing the 0 h, 5h and 24 h in the  
176 treatment of intraperitoneal injection of glucose, and 0 h, 3 h and 12 h in the oral  
177 glucose administration.

## 178 2.8. Statistics analysis

179 All data were expressed as means  $\pm$  standard error and performed using SPSS  
180 17.0. A one-way analysis of variance (ANOVA) was used to compare the differences  
181 in relative brain-gut peptides gene expression over time. When overall differences were  
182 considered statistically significant at  $P < 0.05$ , Tukey's test was used to compare the  
183 means among individual treatments.

184

## 185 **3. Results**

### 186 3.1. Concentrations of glucose and insulin in serum

187 Concentrations of glucose in serum reached the peak ( $20.06 \pm 1.92$  mM) at 5h after  
188 the IP injection of glucose, which was about 28 times as high as that at 0h  
189 ( $0.71 \pm 0.25$  mM) (Figure 2A). From the 5h to 24h after injection, the blood glucose  
190 decreased to  $7.40 \pm 5.47$  mM. There was no significant difference in blood glucose  
191 between the time point of 0h and 24h (Figure 2A). After injection of glucose, the  
192 insulin concentration in serum was decreased to the lowest value ( $1.58 \pm 0.21$  mIU/L) at  
193 3h (Figure 2B). After that, it grew gradually to the normal value at 24h  
194 ( $3.03 \pm 0.006$  mIU/L) as that at 0h ( $3.20 \pm 0.18$  mIU/L).

195 After oral administration of glucose, blood glucose concentration had rapidly  
196 increased at 3h ( $1.90 \pm 0.23$  mM), and it was higher than those at the other time points.  
197 After the 3<sup>rd</sup> hour, the blood glucose concentration decreased gradually (Figure 2C).  
198 The serum insulin concentration increased from  $2.36 \pm 0.21$  mIU/L (0h) to  
199  $3.37 \pm 0.34$  mIU/L (3h). It returned to the normal level after 5h, and then, kept relatively

200 stable (Figure 2D).

### 201 3.2. Tissue distribution of peptides genes

202 Results of the gene distribution and expression are shown in Figure 3 and Table 1.  
203 The relative expressions of prosomatostatin (Pro-SS) and orexin precursor (Pro-OX) in  
204 brain were relatively higher than that in the other analyzed tissues including stomach,  
205 gill, spleen, muscle, liver, kidney, intestine and eyes. Gastrin was mainly expressed in  
206 intestine (Figure 3). NPY, CCK precursor (Pro-CCK), Preprovasoactive intestinal  
207 peptide (Pro-VIP) and PACAP were detected in many tissues (Figure 3). Relative  
208 expression of NPY had the highest value in brain, and followed by the eye, gill and  
209 spleen. Relative expression of Pro-CCK was up to maximum in brain, followed by the  
210 intestine and stomach. The expression of Pro-VIP was relatively high in intestine, but  
211 low in brain, stomach, gill, spleen and eyes. The PACAP had the highest expression in  
212 intestine, then brain.

### 213 3.3. Gene expressions after glucose administration

#### 214 3.3.1. Gene expression of the Pro-SS, NPY, Pro-CCK and Pro-OX in brain

215 Results of the gene expression in brain after glucose administration are shown in  
216 Figure 4.

217 One hour after the intraperitoneal injection of glucose, mRNA levels of the  
218 Pro-SS were significantly increased, then it was not significantly differed from that at  
219 0h at the others time points. In the group of IP PBS, there were no significant different  
220 in mRNA levels of Pro-SS among all the time points (Fig.4A).

221 After oral glucose administration, Pro-SS mRNA levels were significantly  
222 up-regulated at the time point of 3h and 5h (Fig.4B). The NPY mRNA levels were  
223 significantly increased only at 3h after IP and 5h after OR glucose (Fig.4C, 4D). The  
224 cholecystokinin precursor (Pro-CCK) mRNA levels were significantly increased only  
225 at 5h after IP and 3h after OR glucose (Fig. 4E, 4F). The Pro-OX mRNA levels  
226 significantly decreased at all the time points after IP glucose. However, there were no  
227 significant differences among all the time points after OR glucose (Fig.4G, 4H).

#### 228 3.3.2. Gene expression of Pro-VIP, PACAP and gastrin in intestine

229 Results of the gene expression in intestine after glucose administration are shown



230 in Figure 5.

231 There were no significant differences in gene expressions of preprovasoactive  
232 intestinal peptide (Pro-VIP), PACAP and gastrin among all the time points after IP  
233 glucose.

234 There was only one time point after OR glucose at which that the expressions of  
235 these three genes were significantly higher than that at 0h. The time point was 1h, 3h  
236 and 1h, respectively. There were no significant differences between the rest time points  
237 and 0h.

### 238 3.4. Heatmap of glucose affected brain-gut peptides gene expression

239 The expression of brain-gut peptides gene in brain and intestines of Japanese  
240 flounder by different ways of glucose administration was analyzed on heatmap (Fig.6).  
241 As shown in Figure 6, it consists of two treatment groups: intraperitoneal injection  
242 glucose (1g/Kg) and oral glucose administration (1.67/Kg). The results show that in  
243 intraperitoneal injection glucose (1g/Kg), the gene expressions of Pro-SS, NPY,  
244 Pro-CCK were increased at 1h, 3h, 5h compared to 0h respectively, and Pro-OX  
245 expression was declined after 1h. In oral glucose group (1.67g/Kg), Pro-SS, NPY,  
246 Pro-CCK expression increased at 3-5h, 5h and 3h respectively, and the mRNA levels of  
247 Pro-VIP, PACAP, Gastrin were promoted at 1h, 3h and 1h, respectively.

### 248 3.5. Gene expression of glucokinase (GK) and fructose-1,6-bisphosphatase (FBPase) 249 in liver

250 Results of the gene expression of GK and FBPase in liver after glucose  
251 administration are shown in Figure 7. The fish showed the highest GK mRNA level  
252 after IP and OR glucose at 5h and 3h, respectively (Fig.7A, 7B). The FBPase mRNA  
253 level significantly decreased at 5h and 3h after IP and OR glucose, respectively. And  
254 then increased at 24h and 12h, respectively, and had no significant differences with that  
255 at 0h.

### 256 3.6. Glycogen in liver

257 The changes of liver glycogen contents are shown in Figure8. In the IP glucose  
258 group, liver glycogen content decreased at 3h and increased after 5h. And the  
259 significant highest value was found at 9h. In the OR glucose group, the highest value

260 of liver glycogen content was found at 5 h. By contrast, the liver glycogen contents in  
261 the PBS groups showed no significant differences among all the time points.

262

## 263 **4. Discussion**

### 264 ***4.1 Blood glucose levels changed by different ways of glucose administration***

265 The present study showed that the blood glucose content of Japanese flounder  
266 reached its peak ( $20.06 \pm 1.92 \text{mM}$ ) at 5h after intraperitoneal injection of glucose  
267 (500mg/ml, 1g/Kg) and hyperglycemia lasted about 21 hours. This was similar with the  
268 previous study on Australian snapper *Pagrus auratus*, in which the blood glucose  
269 reached to the peak at 3h ( $18.9 \text{mM}$ ) and the hyperglycemia lasted for about 18 hours  
270 (Booth, Anderson et al. 2006). However, after intraperitoneal injected same or even a  
271 higher dose of glucose, some omnivorous fish like tilapia, white sea bream, spends  
272 from 1-2 hours reaching to the peak in the concentration of blood glucose and 6-9  
273 hours recovering as usual (Wright Jr, O'Hali et al. 1998, Enes, Peres et al. 2012). It was  
274 suggested that the omnivorous fish species had higher ability of blood glucose control  
275 than the carnivorous. After oral administration of glucose (500mg/ml, 1.67g/kg), blood  
276 glucose of Japanese flounder peaked ( $1.90 \pm 0.23 \text{mM}$ ) at 3h, and it returned to normal  
277 level ( $0.89 \pm 0.04 \text{mM}$ ) at 7h. Duration of hyperglycemia is about 5 hours. These results  
278 are similar to those previous researches in carnivorous grouper (1.67g/Kg) (Yang, Ye et  
279 al. 2012). As carnivorous fish, however, the duration of hyperglycemia is about 10  
280 hours and 36 hours in black carp *Mylopharyngodon piceus* and Chinook salmon  
281 *Oncorhynchus tshawytscha* after oral administration of glucose (1.67g/Kg),  
282 respectively. It was suggested that in carnivorous fishes, glucose tolerance significantly  
283 differed in species. In addition to the species difference, the culture environment and  
284 conditions could also be part of the reasons. As an omnivorous fish, after oral  
285 administration of glucose (1.67g/Kg) in allognogenetic gibel carp, the blood glucose  
286 concentration reached the peak value ( $26.04 \text{mM}$ ) at 3h, and the hyperglycemia lasted  
287 about 7 hours (Ying 2003). As a herbivorous fish, after oral administration of glucose  
288 (1.67g/Kg) in grass carp *Ctenopharyngodon idellus*, the highest blood glucose  
289 concentration reached at 3h, and the hyperglycemia lasted about 6 hours (Huang, Ding

290 et al. 2005). It was suggested that the carnivorous fish had lower ability of blood  
291 glucose control than the omnivorous and herbivorous.

292 In the present study, the hyperglycemia lasted 5 hours in oral administration of  
293 glucose group, and the highest concentration of blood glucose was  $1.90 \pm 0.32$  mM.  
294 While in the IP injection of glucose group, the hyperglycemia lasted 21 hours, and the  
295 peak value of blood glucose was  $20.06 \pm 2.72$  mM. It was suggested that the Japanese  
296 flounder has stronger capacity in eliminating glycaemia caused by oral administration  
297 of glucose than by the IP injection of glucose. This could be partly due to the following  
298 reasons. In OR glucose group, a portion of glucose could be consumed when glucose  
299 enters gastrointestinal tract. While the left portion of glucose was absorbed into  
300 bloodstream. If high glucose loads in this experiment caused pathology, oral glucose  
301 may likely discharge to the vitro through digestive tract. Glucose by the way of  
302 intraperitoneal injection was mostly absorbed into the bloodstream directly by the  
303 peritoneal capillary.

304 In IP injection glucose, the content of insulin declined as blood glucose rose  
305 (3h-24h), from 0h to 3h. After the third hour, the insulin did not recover at the original  
306 value at all. However, in oral glucose administration, as the blood glucose going up  
307 (1h- 7h), the insulin was growing as well (1h-5h). Therefore, the different tendency of  
308 insulin is also the sound reason of short last of hyperglycemia in oral glucose  
309 administration.

310

#### 311 ***4.2 Serum insulin changed by different ways of glucose administration***

312 In the present study, serum insulin level sharply declined in intraperitoneal  
313 injection of glucose group, and then increased. The results are similar to the previous  
314 study in rainbow trout with IP injection of glucose (Harmon, Eilertson et al. 1991) and  
315 grouper *Epinphelus Coioides* by OR administration of glucose (Yang, Ye et al. 2012).

316 In Japanese flounder, IP glucose was mostly absorbed in the bloodstream through  
317 the peritoneal capillary. This leads to the continuous rise of blood glucose. Glucose  
318 comes to the brain through blood circulation. Due to the arcuate nucleus in the  
319 hypothalamus of the blood-brain barrier permeability being high, after the stimulating

320 of glycemia to brain, the gene expression of Pro-SS, NPY, Pro-CCK and Pro-OX was  
321 significantly different at 1h, 3h, 5h and 1h compared to 0h, respectively. It was  
322 suggested that the sensitivity of these hormones in the brain was different. This also  
323 shows that in the period of blood glucose raised by IP injection glucose, the hormones  
324 play different roles. Combining the function of these hormones in mammal, it was  
325 suggested that insulin declined at 3h after IP injection glucose administration could be  
326 relevant to these hormones.

327 The gene transcript of Pro-SS and NPY was up-regulated at 1h and 3h,  
328 respectively after IP glucose. The function of the SS and NPY is to inhibit the secretion  
329 of insulin. Pro-OX expression was down-regulated at 1h. The function of OX is to  
330 enhance insulin production which is stimulated by glucose (Nowak, Maćkowiak et al.  
331 1999). That is to say the secretion of insulin was depressed in the first 3 hours after IP  
332 glucose administration. After 3h of IP glucose, insulin levels rose. Simultaneously, the  
333 gene expression of Pro-CCK significantly elevated. The CCK function is to stimulate  
334 insulin secretion (Hermansen 1984). After intraperitoneal injection, glucose didn't  
335 enter into intestinal but directly into abdominal cavity capillary, so there was no  
336 significant difference in expression of gut hormone genes, such as Pro-VIP, PACAP  
337 and gastrin (Fig 9A).

338 In OR glucose group, glucose enters into gastrointestinal tract, while parts of  
339 glucose were consumed by cells and other parts of glucose were absorbed into the  
340 bloodstream. After oral glucose administration, insulin increased at 1-3h, meanwhile it  
341 begun to drop after 3h. Pro-CCK expression which could promote the secretion of  
342 insulin runs up at 3h. The differences of expression quantity of Pro-SS occurred at 3-5h,  
343 while for NPY the difference appeared at 5h. Both SS and NPY can inhibit the  
344 secretion of insulin in mammals. Before high glycemia appears, hormones in gut which  
345 can stimulate insulin secretion like VIP (Ahren and Lundquist 1981), PACAP  
346 (Filipsson, Sundler et al. 1999), gastrin (Ahren and Lundquist 1981) were high in  
347 expression at 1h, 1h and 3h, respectively. In mammals, when food enters into intestine,  
348 intestinal mucosal cells can secrete a variety of gastrointestinal hormones, which have  
349 an important effect on the secretion of insulin. These hormones include

350 glucose-dependent insulintropic polypeptides, glucagon-like peptide-1, gastrin, etc.  
351 As the intestinal signals, it can stimulate insulin secretion before glycemia appears to  
352 align the body absorbed nutrient.

353 In mammals, SS, NPY, CCK, OX, VIP, PACAP and gastrin belong to the  
354 brain-gut peptide hormones, and they can be found in the brain and intestines. In the  
355 present study, only the Pro-CCK, Pro-VIP and PACAP were found both in the brain  
356 and intestine. The expressions of Pro-SS and Pro-OX were only detected in the brain.  
357 And the expression of gastrin was only found in the gut. This could be due to the less  
358 secretion of these hormones. Anyway, it was confirmed that the brain-gut peptides and  
359 their gene expression were detected in brain and gut. This could support the hypothesis  
360 of brain-intestine connection in Japanese flounder. In mammals, the function of CCK  
361 in the gut is to control the release of pancreatic enzyme and gallbladder contraction.  
362 It acts as a neurotransmitter, which can control feeding, analgesia, blood pressure,  
363 memory, insulin release in the nervous system (Du Jing 2007). Pro-VIP and PACAP  
364 are mainly as neurotransmitter in brain. In the digestive system, they mainly act as  
365 gastrointestinal hormones, and promote insulin secretion (Filipsson, Sundler et al. 1999,  
366 Xu Wei 2002, Zhang Yang 2009).

367 The reason could be that in the early stage of glucose administration, the blood  
368 glucose increased sharply. It could cost large number of insulin original in the body. At  
369 the same time, the insulin secretion stimulating by glucose administration could be less  
370 than the costing. So the serum insulin concentration declined sharply.

371 The insulin content in group of IP glucose as a whole tends to increase after 3h,  
372 but it does not exceed value at 0h. The result, with the value higher than that at 0h, is  
373 different from that in OR group. This may in that the apoptosis of  $\beta$ -cell leads to the  
374 decrease of the function of insulin

375 In my experiments, serum insulin will increase with blood glucose rise. Therefore,  
376 we can get a conclusion that insulin changes are the result of a combination of blood  
377 glucose and brain-gut peptides.

378

379 ***4.3 Metabolism responses of the glycolysis and gluconeogenesis in liver***

380 Glycolysis and gluconeogenesis mainly participate in the catabolism and synthesis  
381 of carbohydrate, coordinating with each other to ensure the glucose homeostasis of fish  
382 (Nie Q, 2013). As one of the hexokinase (HK) isoenzymes, GK is the initial enzyme of  
383 the glycolytic pathway, and the FBPase is one of the key enzymes in the  
384 gluconeogenesis pathway. In the present study, the gene expression of GK was  
385 significantly enhanced both after IP injection and OR glucose. Similar results were  
386 found in turbot (Nie, Miao et al. 2015), gilthead sea bream (Metón, Caseras et al. 2004)  
387 and common carp (Panserat, Rideau et al. 2014). Compared to the GK, the gene  
388 expression of FBPase was significantly decreased in the treatment of intraperitoneal  
389 injection at 5 h. Meanwhile, the similar results were found in the group of oral glucose.  
390 Researches in European sea bass found that dietary starch (10% to 30%) could not  
391 affect the FBPase activity and gene expression (Moreira, Peres et al. 2008). In  
392 omnivores like common carp, Panserat, Plagnes-Juan et al. (2002) also reported that  
393 there are no significant differences in FBPase gene expression between the fish fed  
394 with carbohydrates or not. The result suggested that the gene expression was  
395 irrespective to the carbohydrate intake. Furthermore, (Fernández, Miquel et al. 2007) it  
396 also found that dietary cornstarch (5% to 26%) could not affect the FBPase gene  
397 expression in gilthead sea bream, whereas Panserat, Plagnes-Juan et al. (2002) found  
398 that the gene expression of FBPase significantly decreased after fed dietary  
399 carbohydrate (20%).

400 Researches in rainbow trout, tilapia, European sea bass and gilthead sea bream  
401 showed that the liver glycogen content significantly increased when fed dietary  
402 carbohydrates (Mazur, Higgs et al. 1992, Shiau and Liang 1995, Couto, Enes et al.  
403 2008, Moreira, Peres et al. 2008). In the present study, the reduction in liver glycogen  
404 content during the first 3 hours after injection or 1 hour after oral glucose might be  
405 explained by the effect of glycogenolysis in fish. To some degree, this was similar to  
406 the previous finding in turbot (Garcia-Riera and Hemer 1996). Peres, Goncalves et al.  
407 (1999) found that liver glycogen content of seabream significantly decreased during  
408 the first hour after glucose injection, while the liver glycogen content of seabass  
409 increased significantly. In present study, IP glucose group, liver glycogen content

410 increased after 5h. And the significant highest value was found at 9h. In the OR  
411 glucose group, the highest value of liver glycogen content was found at 5 h. The liver  
412 glycogen content reached their maximum behind the occurrence of blood glucose peak.  
413 This is an evidence for Japanese flounder to turn glucose into glycogen. It could be a  
414 strategy to ease the stress of high blood glucose in Japanese flounder.

415 In the present study, when the blood glucose concentration peaked in both IP and  
416 OR group, the GK was stimulated and the FBPase was depressed. This could be the  
417 responses to decrease the hyperglycemia. In the IP glucose group, liver glycogen  
418 content decreased at the 3h, then went up at the 5h, peaked at the 9h. In the OR glucose  
419 group, the highest value of liver glycogen content was found at the 5h. It is obviously  
420 that the time of glycogen synthesis and reaching peak was later than those of  
421 hyperglycemia. It is suggested that organism reduces blood glucose by glycogen  
422 synthesis.

423 The function of insulin in glucose metabolize is through insulin receptor  
424 substrate-1 (IRS-1), activation of PI<sub>3</sub>K, and consequent Akt phosphorylation, further  
425 phosphorylate downstream signaling protein, such as AS160, mTORC1, FoxO1 and  
426 GSK3. phosphorylation of AS160 is required for GLUT4 translocation and it can  
427 promote tissue uptake glucose (Sano, Kane et al. 2003). mTORC1 activation is  
428 sufficient to stimulate glycolysis, the oxidative arm of the pentose phosphate pathway,  
429 and promote the decomposition of glucose (Düvel, Yecies et al. 2010). Insulin levels  
430 increase upon feeding and signal through Akt to suppress Foxo1 by phosphorylation  
431 and exclusion from the nucleus. gluconeogenesis genes are regulated by Foxo1 (Gross,  
432 Wan et al. 2009). Akt phosphorylates and inactivates GSK-3 increased GLUT1 levels  
433 and in enhanced glucose uptake through these high-affinity transporters. (Buller,  
434 Loberg et al. 2008) Insulin signal pathway also promote glycogen synthesis by  
435 inactivates GSK-3 though phosphorylates Akt (Lochhead, Coghlan et al. 2001).

436 In conclusion, in the present study, brain-gut peptides were confirmed in the  
437 present study. And the serum insulin and the brain-gut peptides have different  
438 responses between the IP and OR administration of glucose. A negative feedback  
439 mechanism in the insulin-regulated glucose homeostasis was suggested in Japanese

440 flounder. Furthermore, this regulation could be conducted by activating PI3k-Akt, and  
441 then lead to the pathway downstream changes in glycolysis and gluconeogenesis. This  
442 supposition was expressed in Figure 10.

443

#### 444 **Acknowledgements**

445 This study was financially supported by the National Basic Research Program  
446 (973 program, No. 2014CB138600), the National Natural Science Foundation of China  
447 (No. 31572628) and the Fundamental Research Funds for the Central Universities of  
448 Ocean University of China (No. 201562017).

449

#### 450 **Competing interests**

451 The authors declare no competing or financial interests.

452

#### 453 **Author contributions**

454 W.B.Z. and K.S.M. designed the experiment and revised the manuscript. D.L.,  
455 D.D.H., B.Y.G, K.Y.D., Z.X.G., M.X.Y. and W.X. completed the experiment and  
456 analyzed the data. D.L. and D.D.H. prepared the manuscript. All authors were involved  
457 in the discussion of experimental data.

458

#### 459 **Funding**

460 This study was financially supported by the National Basic Research Program  
461 (973 program, No. 2014CB138600), the National Natural Science Foundation of China  
462 (No. 31572628) and the Fundamental Research Funds for the Central Universities of  
463 Ocean University of China (No. 201562017).

464



465 **References**

- 466 **Aguilar, A. J., M. Conde-Sieira, S. Polakof, J. M. Míguez and J. L. Soengas** (2010).  
467 "Central leptin treatment modulates brain glucosensing function and peripheral  
468 energy metabolism of rainbow trout." *Peptides* **31**(6): 1044-1054.
- 469 **Ahren, B. and I. Lundquist** (1981). "Effects of vasoactive intestinal polypeptide  
470 (VIP), secretin and gastrin on insulin secretion in the mouse." *Diabetologia* **20**(1):  
471 54-59.
- 472 **Alberti, K., N. J. Christensen, S. E. Christensen, A. P. Hansen, J. Iversen, K.**  
473 **Lundbaek, K. Seyer-Hansen and H. Orskov** (1973). "Inhibition of insulin  
474 secretion by somatostatin." *The Lancet* **302**(7841): 1299-1301.
- 475 **Björkqvist, M., M. Bernsand, L. Eliasson, R. Håkanson and E. Lindström** (2005).  
476 "Somatostatin, misoprostol and galanin inhibit gastrin-and PACAP-stimulated  
477 secretion of histamine and pancreastatin from ECL cells by blocking specific Ca  
478 2+ channels." *Regulatory peptides* **130**(1): 81-90.
- 479 **Booth, M. A., A. J. Anderson and G. L. Allan** (2006). "Investigation of the  
480 nutritional requirements of Australian snapper *Pagrus auratus* (Bloch & Schneider  
481 1801): digestibility of gelatinized wheat starch and clearance of an  
482 intra-peritoneal injection of d-glucose." *Aquaculture Research* **37**(10): 975-985.
- 483 **Bredkjoer, H., C. Palle, E. Ekblad, J. Fahrenkrug and B. Ottesen** (1997).  
484 "PreproVIP-derived peptides in the human female genital tract: expression and  
485 biological function." *Neuropeptides* **31**(3): 209-215.
- 486 **Buller, C. L., R. D. Loberg, M.-H. Fan, Q. Zhu, J. L. Park, E. Vesely, K. Inoki,**  
487 **K.-L. Guan and F. C. Brosius** (2008). "A GSK-3/TSC2/mTOR pathway  
488 regulates glucose uptake and GLUT1 glucose transporter expression." *American*  
489 *Journal of Physiology-Cell Physiology* **295**(3): C836-C843.
- 490 **Cerdá-Reverter, J. M., L. A. Sorbera, M. Carrillo and S. Zanuy** (1999). "Energetic  
491 dependence of NPY-induced LH secretion in a teleost fish (*Dicentrarchus*  
492 *labrax*)." *American Journal of Physiology-Regulatory, Integrative and*  
493 *Comparative Physiology* **277**(6): R1627-R1634.
- 494 **Couto, A., P. Enes, H. Peres and A. Oliva-Teles** (2008). "Effect of water temperature

- 495 and dietary starch on growth and metabolic utilization of diets in gilthead sea  
496 bream (*Sparus aurata*) juveniles." *Comparative Biochemistry and Physiology Part*  
497 *A: Molecular & Integrative Physiology* **151**(1): 45-50.
- 498 **Cowey, C. B. and M. J. Walton** (1989). "Intermediary metabolism." *Fish nutrition* **2**:  
499 259-329.
- 500 **Düvel, K., J. L. Yecies, S. Menon, P. Raman, A. I. Lipovsky, A. L. Souza, E.**  
501 **Triantafellow, Q. Ma, R. Gorski and S. Cleaver** (2010). "Activation of a  
502 metabolic gene regulatory network downstream of mTOR complex 1." *Molecular*  
503 *cell* **39**(2): 171-183.
- 504 **Deavall, D. G., R. Raychowdhury, G. J. Dockray and R. Dimaline** (2000). "Control  
505 of CCK gene transcription by PACAP in STC-1 cells." *American Journal of*  
506 *Physiology-Gastrointestinal and Liver Physiology* **279**(3): G605-G612.
- 507 **Du Jing , Z. L., QinChuan** (2007). "Progress on the Function of Cholecystokinin."  
508 *Chinese Journal Of Comparative Medicine* **17**(4): 233-236.
- 509 **Eilertson, C. D., P. K. O'connor and M. A. Sheridan** (1991). "Somatostatin-14 and  
510 somatostatin-25 stimulate glycogenolysis in rainbow trout, *Oncorhynchus mykiss*,  
511 liver incubated in vitro: a systemic role for somatostatins." *General and*  
512 *comparative endocrinology* **82**(2): 192-196.
- 513 **Eilertson, C. D. and M. A. Sheridan** (1993). "Differential effects of somatostatin-14  
514 and somatostatin-25 on carbohydrate and lipid metabolism in rainbow trout  
515 *Oncorhynchus mykiss*." *General and comparative endocrinology* **92**(1): 62-70.
- 516 **Enes, P., H. Peres, P. Pousao-Ferreira, J. Sanchez-Gurmaches, I. Navarro, J.**  
517 **Gutiérrez and A. Oliva-Teles** (2012). "Glycemic and insulin responses in white  
518 sea bream *Diplodus sargus*, after intraperitoneal administration of glucose." *Fish*  
519 *physiology and biochemistry* **38**(3): 645-652.
- 520 **Fernández, F., A. G. Miquel, M. Córdoba, M. Varas, I. Metón, A. Caseras and I. V.**  
521 **Baanante** (2007). "Effects of diets with distinct protein-to-carbohydrate ratios on  
522 nutrient digestibility, growth performance, body composition and liver  
523 intermediary enzyme activities in gilthead sea bream (*Sparus aurata*, L.)  
524 fingerlings." *Journal of Experimental Marine Biology and Ecology* **343**(1): 1-10.

- 525 **Filipsson, K., F. Sundler and B. Ahrén** (1999). "PACAP is an islet neuropeptide  
526 which contributes to glucose-stimulated insulin secretion." *Biochemical and*  
527 *biophysical research communications* **256**(3): 664-667.
- 528 **Fu, L.-Y., C. Acuna-Goycolea and A. N. Van Den Pol** (2004). "Neuropeptide Y  
529 inhibits hypocretin/orexin neurons by multiple presynaptic and postsynaptic  
530 mechanisms: tonic depression of the hypothalamic arousal system." *The Journal*  
531 *of neuroscience* **24**(40): 8741-8751.
- 532 **Garcia-Riera, M. and G. I. Hemer** (1996). "Glucose tolerance in turbot,  
533 *Scophthalmus maximus* (L.)." *Aquaculture Nutrition* **2**(2): 117-120.
- 534 **Gross, D. N., M. Wan and M. J. Birnbaum** (2009). "The role of FOXO in the  
535 regulation of metabolism." *Current diabetes reports* **9**(3): 208-214.
- 536 **Harmon, J. S., C. D. Eilertson, M. A. Sheridan and E. M. Plisetskaya** (1991).  
537 "Insulin suppression is associated with hypersomatostatinemia and  
538 hyperglucagonemia in glucose-injected rainbow trout." *American Journal of*  
539 *Physiology-Regulatory, Integrative and Comparative Physiology* **261**(3):  
540 R609-R613.
- 541 **Hermansen, K.** (1984). "Effects of Cholecystokinin (CCK)-4, Nonsulfated CCK-8,  
542 and Sulfated CCK-8 on Pancreatic Somatostatin, Insulin, and Glucagon Secretion  
543 in the Dog: Studies in Vitro\*." *Endocrinology* **114**(5): 1770-1775.
- 544 **Huang, H., L. Ding, X. Song, Y. Wang and C. Yang** (2005). "Comparative research  
545 on glucose tolerance between black carp *Mylopharyngodon piceus* and grass carp  
546 *Ctenopharyngodon idellus*." *Journal of Fishery Sciences of China* **12**(4): 496-500.
- 547 **Li, S., V. Grinevich, A. Fournier and G. Pelletier** (1996). "Effects of pituitary  
548 adenylate cyclase-activating polypeptide (PACAP) on gonadotropin-releasing  
549 hormone and somatostatin gene expression in the rat brain." *Molecular brain*  
550 *research* **41**(1): 157-162.
- 551 **Livak, K. J. and T. D. Schmittgen** (2001). "Analysis of relative gene expression data  
552 using real-time quantitative PCR and the  $2^{-\Delta\Delta CT}$  method." *methods* **25**(4):  
553 402-408.
- 554 **Lloyd, K., V. Maxwell, C.-N. Chuang, H. Wong, A. Soll and J. Walsh** (1994).

- 555 "Somatostatin is released in response to cholecystokinin by activation of type A  
556 CCK receptors." *Peptides* **15**(2): 223-227.
- 557 **Lochhead, P. A., M. Coghlan, S. Q. Rice and C. Sutherland** (2001). "Inhibition of  
558 GSK-3 selectively reduces glucose-6-phosphatase and phosphoenolpyruvate  
559 carboxykinase gene expression." *Diabetes* **50**(5): 937-946.
- 560 **May, A. A., M. Liu, S. C. Woods and D. P. Begg** (2016). "CCK increases the  
561 transport of insulin into the brain." *Physiology & Behavior* **165**: 392-397.
- 562 **May, V. and K. M. Braas** (1995). "Pituitary Adenylate Cyclase-Activating  
563 Polypeptide (PACAP) Regulation of Sympathetic Neuron Neuropeptide Y and  
564 Catecholamine Expression." *Journal of neurochemistry* **65**(3): 978-987.
- 565 **Mazur, C., D. Higgs and E. Plisetskaya** (1992). "Utilization of dietary starch and  
566 glucose tolerance in rainbow trout (*Oncorhynchus tshawytscha*) of different  
567 strains in sea water." *Fish Physiol Biochem* **10**: 203-213.
- 568 **Metón, I., A. Caseras, F. Fernández and I. V. Baanante** (2004). "Molecular cloning  
569 of hepatic glucose-6-phosphatase catalytic subunit from gilthead sea bream  
570 (*Sparus aurata*): response of its mRNA levels and glucokinase expression to  
571 refeeding and diet composition." *Comparative Biochemistry and Physiology Part*  
572 *B: Biochemistry and Molecular Biology* **138**(2): 145-153.
- 573 **Moltz, J. H. and J. K. McDonald** (1985). "Neuropeptide Y: direct and indirect action  
574 on insulin secretion in the rat." *Peptides* **6**(6): 1155-1159.
- 575 **Mommsen, T. and E. Plisetskaya** (1991). "Insulin in fishes and agnathans-history,  
576 structure, and metabolic-regulation." *Reviews in Aquatic Sciences* **4**(2-3):  
577 225-259.
- 578 **Moreira, I., H. Peres, A. Couto, P. Enes and A. Oliva-Teles** (2008). "Temperature  
579 and dietary carbohydrate level effects on performance and metabolic utilisation of  
580 diets in European sea bass (*Dicentrarchus labrax*) juveniles." *Aquaculture* **274**(1):  
581 153-160.
- 582 **Nie, Q., H. Miao, S. Miao, H. Zhou, Y. Zhang, W. Zhang and K. Mai** (2015).  
583 "Effects of dietary glucose and dextrin on activity and gene expression of  
584 glucokinase and fructose-1, 6-bisphosphatase in liver of turbot *Scophthalmus*

- 585 maximus." *Fish physiology and biochemistry* **41**(3): 819-832.
- 586 **Nowak, K. W., P. Maćkowiak, M. M. Świtońska, M. Fabiś and L. K. Malendowicz**  
587 (1999). "Acute orexin effects on insulin secretion in the rat: in vivo and in vitro  
588 studies." *Life sciences* **66**(5): 449-454.
- 589 **Olsvik, P. A., K. K. Lie, A.-E. O. Jordal, T. O. Nilsen and I. Hordvik** (2005).  
590 "Evaluation of potential reference genes in real-time RT-PCR studies of Atlantic  
591 salmon." *BMC Molecular Biology* **6**(1): 1.
- 592 **Panserat, S., E. Plagnes-Juan and S. Kaushik** (2002). "Gluconeogenic enzyme gene  
593 expression is decreased by dietary carbohydrates in common carp (*Cyprinus*  
594 *carpio*) and gilthead seabream (*Sparus aurata*)." *Biochimica et Biophysica Acta*  
595 (BBA)-Gene Structure and Expression **1579**(1): 35-42.
- 596 **Panserat, S., N. Rideau and S. Polakof** (2014). "Nutritional regulation of glucokinase:  
597 a cross-species story." *Nutrition research reviews* **27**(01): 21-47.
- 598 **Park, J.-H., H.-M. Shim, A.-Y. Na, J.-H. Bae, S.-S. Im and D.-K. Song** (2015).  
599 "Orexin A regulates plasma insulin and leptin levels in a time-dependent manner  
600 following a glucose load in mice." *Diabetologia* **58**(7): 1542-1550.
- 601 **Pearse, A. and T. Takor** (1979). Embryology of the diffuse neuroendocrine system  
602 and its relationship to the common peptides. Federation proceedings.
- 603 **Pereira, R., L. Costa, I. Oliveira, J. Araújo, M. Aerts, F. Vigliano and P. Rosa**  
604 (2015). "Relative distribution of gastrin-, CCK-8-, NPY-and  
605 CGRP-immunoreactive cells in the digestive tract of dorado (*Salminus*  
606 *brasiliensis*)." *Tissue and Cell* **47**(2): 123-131.
- 607 **Peres, H., P. Goncalves and A. Oliva-Teles** (1999). "Glucose tolerance in gilthead  
608 seabream (*Sparus aurata*) and European seabass (*Dicentrarchus labrax*)." *Journal of*  
609 *Aquaculture* **179**(1): 415-423.
- 610 **Polakof, S., J. M. Míguez and J. L. Soengas** (2011). "Cholecystokinin impact on  
611 rainbow trout glucose homeostasis: possible involvement of central  
612 glucosensors." *Regulatory peptides* **172**(1): 23-29.
- 613 **Romijn, J. A., E. P. Corssmit, L. M. Havekes and H. Pijl** (2008). "Gut-brain axis."  
614 *Current Opinion in Clinical Nutrition & Metabolic Care* **11**(4): 518-521.

- 615 **Sano, H., S. Kane, E. Sano, C. P. Mîinea, J. M. Asara, W. S. Lane, C. W. Garner**  
616 **and G. E. Lienhard** (2003). "Insulin-stimulated phosphorylation of a Rab  
617 GTPase-activating protein regulates GLUT4 translocation." *Journal of Biological*  
618 *Chemistry* **278**(17): 14599-14602.
- 619 **Sheridan, M. A., E. M. Plisetskaya, H. A. Bern and A. Gorbman** (1987). "Effects of  
620 somatostatin-25 and urotensin II on lipid and carbohydrate metabolism of coho  
621 salmon, *Oncorhynchus kisutch*." *General and comparative endocrinology* **66**(3):  
622 405-414.
- 623 **Shiau, S.-Y. and H.-S. Liang** (1995). "Carbohydrate utilization and digestibility by  
624 tilapia, *Oreochromis niloticus* crossed with *O. aureus*, are affected by chronic  
625 oxide inclusion in the diet." *The Journal of nutrition* **125**(4): 976.
- 626 **ShuangmingYue, Z. A. g.** (2007). "Resear ch advance of pituitary adenylate cyclase  
627 activating polypeptide." *Feed Industry* **28**(11): 12-16.
- 628 **Soengas, J. L. and M. Aldegunde** (2002). "Energy metabolism of fish brain."  
629 *Comparative Biochemistry and Physiology Part B: Biochemistry and Molecular*  
630 *Biology* **131**(3): 271-296.
- 631 **Vaudry, D., B. J. Gonzalez, M. Basille, L. Yon, A. Fournier and H. Vaudry** (2000).  
632 "Pituitary adenylate cyclase-activating polypeptide and its receptors: from  
633 structure to functions." *Pharmacological reviews* **52**(2): 269-324.
- 634 **Very, N., D. Knutson, J. Kittilson and M. Sheridan** (2001). "Somatostatin inhibits  
635 growth of rainbow trout." *Journal of fish biology* **59**(1): 157-165.
- 636 **Voisin, T., P. Rouet-Benzineb, N. Reuter and M. Laburthe** (2003). "Orexins and  
637 their receptors: structural aspects and role in peripheral tissues." *Cellular and*  
638 *Molecular Life Sciences CMLS* **60**(1): 72-87.
- 639 **Wang, J. and K. L. Leibowitz** (1997). "Central insulin inhibits hypothalamic galanin  
640 and neuropeptide Y gene expression and peptide release in intact rats." *Brain*  
641 *research* **777**(1): 231-236.
- 642 **Washburn, B. S., M. L. Bruss, E. H. Avery and R. A. Freedland** (1992). "Effects of  
643 estrogen on whole animal and tissue glucose use in female and male rainbow  
644 trout." *American Journal of Physiology-Regulatory, Integrative and Comparative*

- 645           Physiology **263**(6): R1241-R1247.
- 646   **Wood, J.** (1996). "Enteric nervous system in pathogenesis of gastrointestinal motility  
647           disorders." *Chin Natl J New Gastroenterol* **2**(Suppl 1): 26-31.
- 648   **Wright Jr, J. R., W. O'Hali, H. Yang, X.-X. Han and A. Bonen** (1998). "GLUT-4  
649           deficiency and severe peripheral resistance to insulin in the teleost fish tilapia."  
650           *General and comparative endocrinology* **111**(1): 20-27.
- 651   **Xu Wei , Z. Y.-h.** (2002). "Progress in Vasoactive Intestinal Peptide." *Pharmaceutical*  
652           *Biotechnology* **9**(6): 364-368.
- 653   **Yang, W., J. Ye, K. Wang, Y. Sun, C. Zhang, S. Zhai and K. Song** (2012). "Glucose  
654           tolerance in grouper (*Epinphelus coioides*)." *Acta Hydrobiologica Sinica* **36**(3):  
655           563-568.
- 656   **Ying, C. C. L.** (2003). "Metabolic responses of allogynogenetic gbel carp after oral  
657           administration of different doses of glucose." *Acta Hydrobiologica Sinica* **27**(6):  
658           602-606.
- 659   **Zhang, S.-c.** (2001). "Hypothesis and Implication of Brain Iitestine Connection."  
660           *Chinese Journal of Basic Medicine in Traditional Chinese Medicine* **8**(6): 6-7.
- 661   **Zhang Yang , L. P.** (2009). "The Research Progress of Vasoactive Intestinal Peptide."  
662           *Medical Recapitulate* **15**(21): 3235-3238.
- 663

664 **Table 1 Expression levels of cholecystinin precursor (Pro-CCK), neuropeptide Y**  
665 **(NPY), preprovasoactive intestinal peptide (Pro-VIP) and pituitary adenylate**  
666 **cyclase activating polypeptide (PACAP) mRNA in Japanese flounder**

|           | Pro-CCK                 | NPY                     | Pro-VIP                 | PACAP                   |
|-----------|-------------------------|-------------------------|-------------------------|-------------------------|
| Eye       | 0.06±0.02 <sup>a</sup>  | 24.42±0.33 <sup>e</sup> | 1.01±0.19 <sup>b</sup>  | 1.04±0.39 <sup>b</sup>  |
| Stomach   | 1.08±0.33 <sup>b</sup>  | 0.32±0.03 <sup>ab</sup> | 4.19±0.61 <sup>c</sup>  | 0.02±0.00 <sup>a</sup>  |
| Gill      | 0.01±0.00 <sup>a</sup>  | 4.87±1.72 <sup>cd</sup> | 1.19±0.03 <sup>b</sup>  | 0.01±0.00 <sup>a</sup>  |
| Spleen    | 0.00±0.00 <sup>a</sup>  | 5.90±1.20 <sup>d</sup>  | 1.03±0.01 <sup>b</sup>  | 0.01±0.00 <sup>a</sup>  |
| Muscle    | 0.00±0.00 <sup>a</sup>  | 1.13±0.08 <sup>ab</sup> | 0.02±0.01 <sup>a</sup>  | 0.00±0.00 <sup>a</sup>  |
| Brain     | 24.17±5.65 <sup>d</sup> | 36.82±3.32 <sup>f</sup> | 8.38±1.01 <sup>c</sup>  | 8.47±0.77 <sup>c</sup>  |
| Liver     | 0.03±0.02 <sup>a</sup>  | 1.54±1.02 <sup>ab</sup> | 0.22±0.24 <sup>a</sup>  | 0.01±0.01 <sup>a</sup>  |
| Kidney    | 0.00±0.00 <sup>a</sup>  | 0.04±0.01 <sup>a</sup>  | 0.03±0.01 <sup>a</sup>  | 0.00±0.00 <sup>a</sup>  |
| Intestine | 5.01±0.69 <sup>c</sup>  | 2.18±0.72 <sup>bc</sup> | 14.54±1.44 <sup>d</sup> | 17.81±2.77 <sup>d</sup> |

667



668 **Table 2 Primers used for gene mRNA quantification by RT-PCR**

| Gene    | Forward primer (5'–3') | Reverse primer (5'0–3') | Target size (bp) | Annealing temperature (°C) | E value |
|---------|------------------------|-------------------------|------------------|----------------------------|---------|
| β-actin | GGAAATCGTGCGTGACATTAAG | CCTCTGGACAACGGAACCTCT   | 155              | 58                         | 1.011   |
| GK      | CTCGGAGCTGCTGAAGACA    | CAGAACACCCAGGGATGAC     | 115              | 60                         | 1.002   |
| FBPase  | CGGTGAGTTCATCTTGGTG    | TCCTCTGGGTATTTCTTCTT    | 135              | 60                         | 0.970   |
| NPY     | AAGACAGAGGTATGGGAAGAG  | CTTGACTGTGGAAGCGTGT     | 99               | 58                         | 0.922   |
| Pro-SS  | AAACTCCGCCTGTTGCTG     | CAGAGCCTCGTTCTCCACC     | 117              | 58                         | 0.932   |
| Pro-CCK | CATCTCGTCCAGGAAAGGT    | TCCATCCAGCCCAAGTAG      | 105              | 57                         | 0.913   |
| Orexin  | ATGCTCATCCTCCTTCCG     | ACCATCTCGCTCCTGTCG      | 127              | 59                         | 0.966   |
| PACAP   | CCCTCCCTGGATTATGAC     | GCTTTCCTGTAGGCTTTATT    | 143              | 60                         | 0.951   |
| Gastrin | AGGGACTCGGCTCACAGA     | TTGGTCATAATCTCCCGTTC    | 101              | 60                         | 0.923   |
| Pro-VIP | GTCAAGCGTCACTCAGATGC   | GGGTCTTCCAGGCTTCTCTT    | 116              | 60                         | 0.974   |

669 G/T = K; A/C = M; A/G = R; C/T = Y; A/T = W

670

671 **Figure legends**

672

673 **Figure 1** The relationship between different hormones in mammals. Red line  
674 stands for promotion, and black line means inhibition. Somatostatin (SS), neuropeptide  
675 Y (NPY), cholecystokinin (CCK), vasoactive intestinal peptide (VIP), pituitary  
676 adenylate cyclase activating polypeptide (PACAP)

677 References: 1(Lloyd, Maxwell et al. 1994), 2 (Deavall, Raychowdhury et al.  
678 2000), 3(Li, Grinevich et al. 1996), 4(Voisin, Rouet-Benzineb et al. 2003), 5(May and  
679 Braas 1995), 6(Hermansen 1984), 7(Hermansen 1984), 8(Fu, Acuna-Goycolea et al.  
680 2004), 9(Alberti, Christensen et al. 1973), 10(Björkqvist, Bernsand et al. 2005),  
681 11(Nowak, Maćkowiak et al. 1999), 12(Wang and Leibowitz 1997), 13(Moltz and  
682 McDonald 1985), 14(Ahren and Lundquist 1981), 15(Filipsson, Sundler et al. 1999),  
683 16(Ahren and Lundquist 1981).

684 **Figure 2** The concentration of blood glucose and serum insulin in Japanese  
685 flounder after intraperitoneal (IP) (A, B) and oral (OR) (C, D) administration of glucose  
686 or phosphate buffer solution (PBS). Each value is expressed as the Mean  $\pm$  SE (n=3).  
687 Values sharing a common superscript letter were not significantly different.

688 **Figure 3** Tissue distributions of brain-gut peptides genes. L: ladder, 1: stomach, 2:  
689 gill, 3: spleen, 4: muscle, 5: brain, 6: liver, 7: kidney, 8: intestine, 9: eyes, N: negative  
690 control. Expression of housekeeping gene  $\beta$ -actin was observed to ensure the integrity  
691 of the cDNA template of each tissue sample. Prosomatostatin (Pro-SS),  
692 cholecystokinin precursor (Pro-CCK), neuropeptide Y (NPY), orexin precursor  
693 (Pro-OX), pituitary adenylate cyclase activating polypeptide (PACAP),  
694 preprovasoactive intestinal peptide (Pro-VIP)

695 **Figure 4** Gene expressions of prosomatostatin (Pro-SS), neuropeptide Y (NPY),  
696 cholecystokinin precursor (Pro-CCK) and orexin precursor (Pro-OX) in the brain of  
697 Japanese Flounder after intraperitoneal (IP) (A, C, E, G) and oral (OR) (B, D, F, H)  
698 administration of glucose (Glu) or phosphate buffer solution (PBS). Each value is  
699 expressed as the Mean  $\pm$  SE (n=3). Values sharing a common superscript letter were  
700 not significantly different.

701 **Figure 5** The gene expression of preprovasoactive intestinal peptide (Pro-VIP),  
702 pituitary adenylate cyclase activating polypeptide (PACAP) and gastrin in the gut of  
703 Japanese Flounder after intraperitoneal (IP) (A, C, E) and oral (OR) (B, D, F)  
704 administration of glucose (Glu) or phosphate buffer solution (PBS). Each value was  
705 expressed as the Mean  $\pm$  SE (n=3). Values sharing a common superscript letter were  
706 not significantly different.

707 **Figure 6** Visualizing gene expression of prosomatostatin (Pro-SS), neuropeptide  
708 Y (NPY), cholecystokinin precursor (Pro-CCK), orexin precursor (Pro-OX),  
709 preprovasoactive intestinal peptide (Pro-VIP), pituitary adenylate cyclase activating  
710 polypeptide (PACAP) and gastrin on heatmap

711 Note: It consists of two treatment groups: intraperitoneal injection glucose (1g/Kg)  
712 and oral glucose administration (1.67/Kg). In this figure, the graphical presentation of  
713 data, numerical values are displayed by colors.

714 **Figure 7** The gene expression of glucokinase (GK) and  
715 fructose-1,6-bisphosphatase (FBPase) in the liver of Japanese Flounder after  
716 intraperitoneal (IP) (A, C) and oral (OR) (B, D) administration of glucose (Glu) or  
717 phosphate buffer solution (PBS). Each value was expressed as the Mean  $\pm$  SE (n=3).  
718 Values sharing a common superscript letter were not significantly different.

719 **Figure 8** The glycogen contents in liver of Japanese flounder after intraperitoneal  
720 (IP) (A) and oral (OR) (B) administration of glucose or phosphate buffer solution  
721 (PBS). Each value was expressed as the Mean  $\pm$  SE (n=3). Values sharing a common  
722 superscript letter were not significantly different.

723 **Figure 9** Summary on the results of the present study. Regulations of glucose  
724 metabolism in brain and intestine were affected by intraperitoneal (IP) (A) and oral  
725 (OR) (B) administration of glucose. Red line stands for stimulation, and black line  
726 means inhibition. The red circle represents the significant promotion effects. The black  
727 circle represents the significant inhibition effects. Black dotted line means inhibition,  
728 but did not show significant difference. The yellow line stands for there is no  
729 significant difference in all time points. Point in time after glucose loads with red and  
730 black symbol means significant difference ( $P<0.05$ ) was found at that time point.

731        **Figure 10** A supposed negative feedback regulation mechanism of glucose  
732 homeostasis controlled by insulin and brain-gut peptides. The insulin could decrease  
733 the blood glucose level of Japanese flounder by activating PI3k-Akt, and then it could  
734 also cause the pathway downstream changes in glycolysis, gluconeogenesis and  
735 glycogenesis. The dashed and dashed boxes represent the relationships that exist in  
736 mammals, which may exist in Japanese flounder.  
737

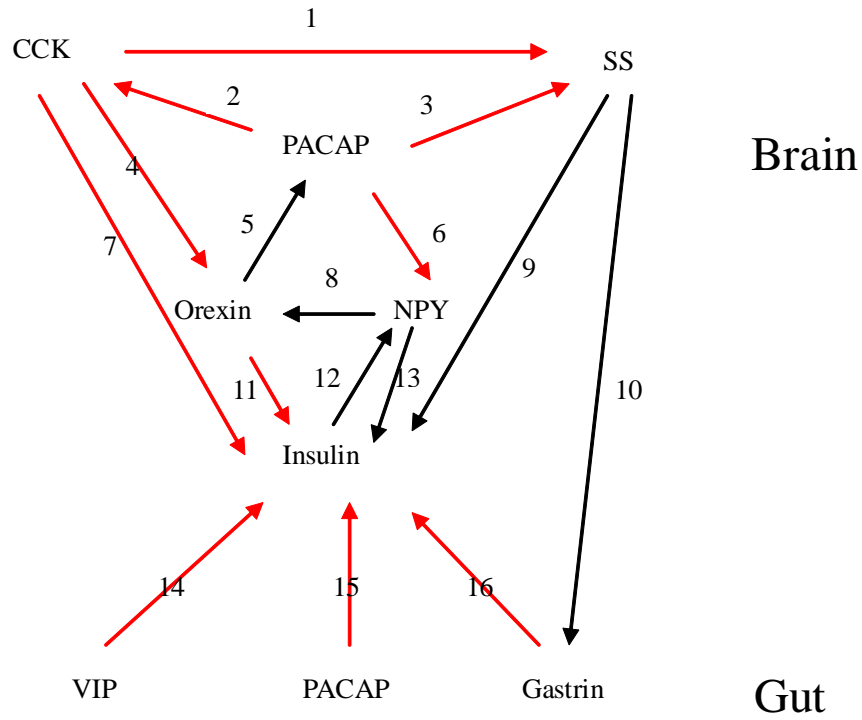

738

739

740 **Figure 1**

741

742

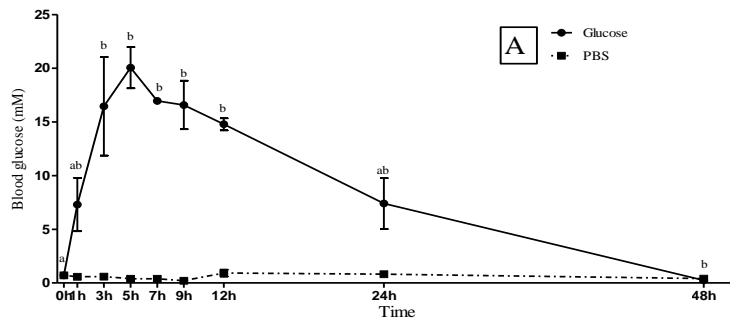

743

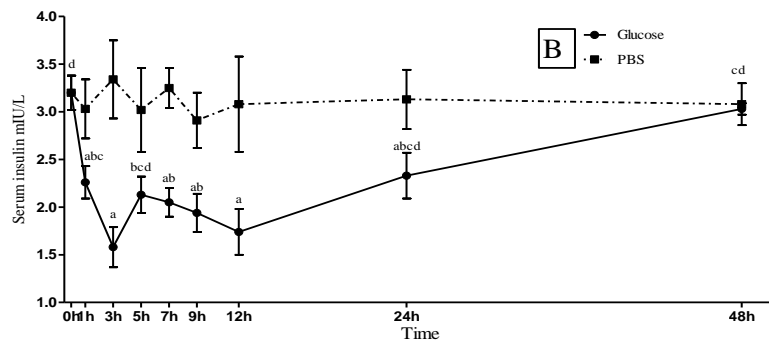

744

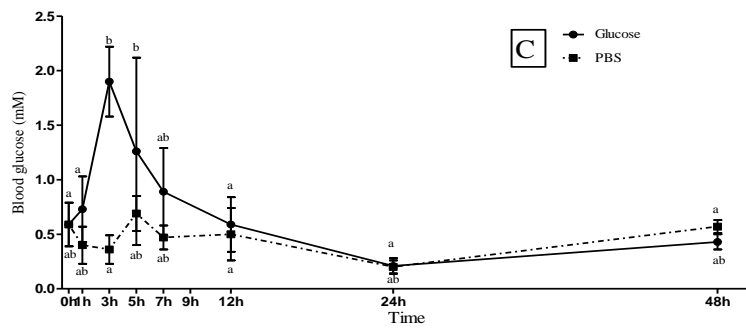

745

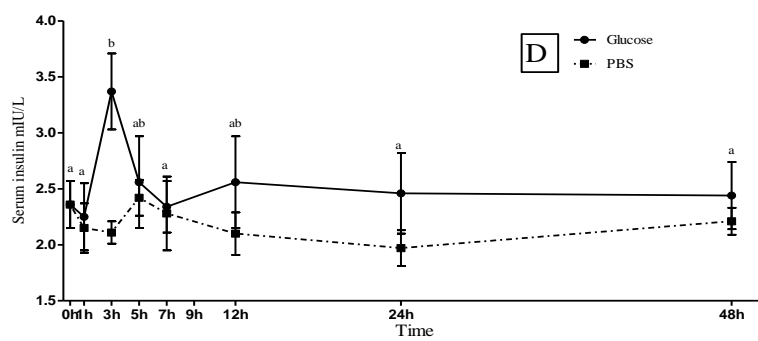

746

747

748

Figure 2

749

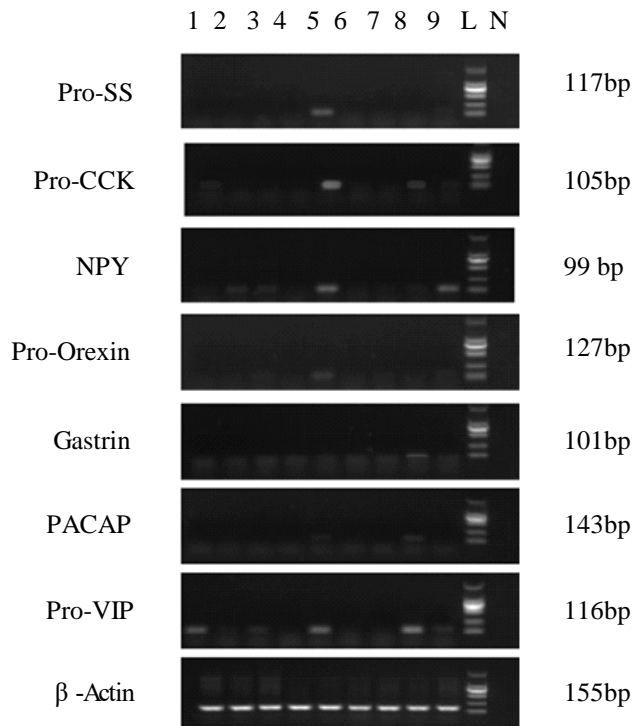

750

751

752 **Figure 3**

753

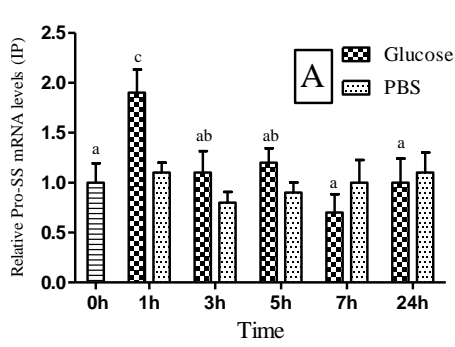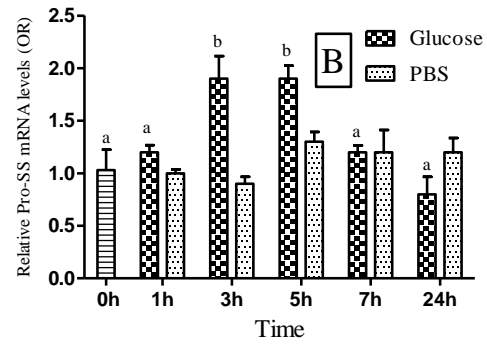

754

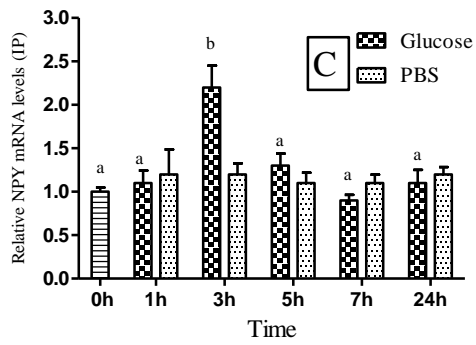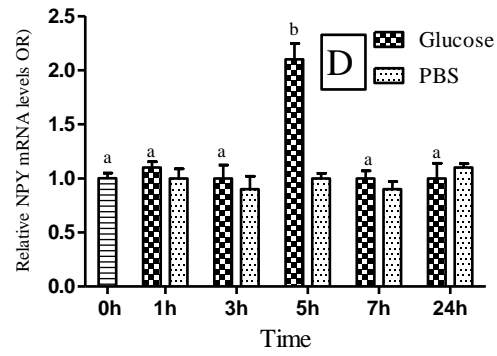

755

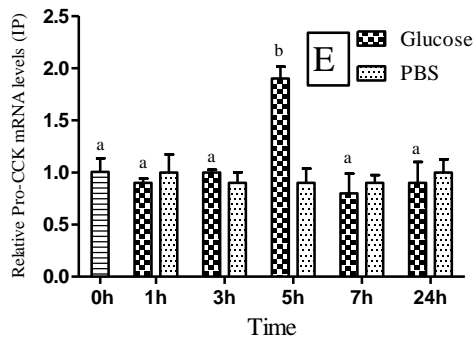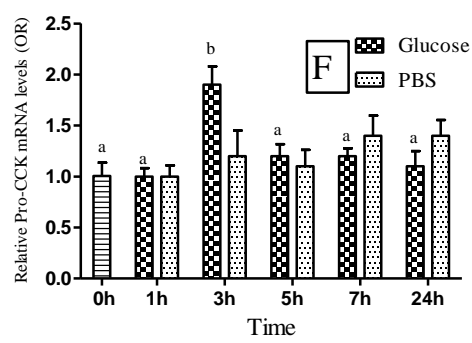

756

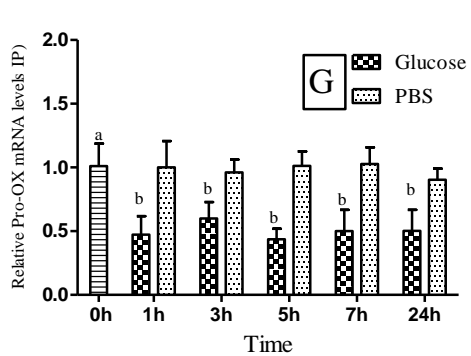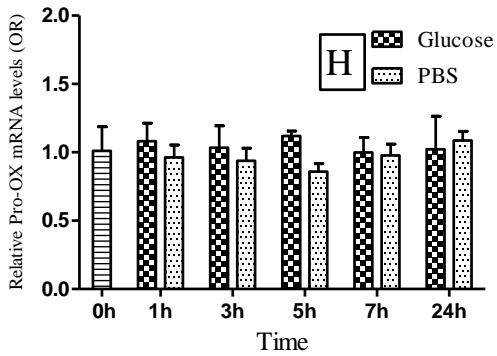

757

758

759 **Figure 4**

760



761

762 Figure 5

763

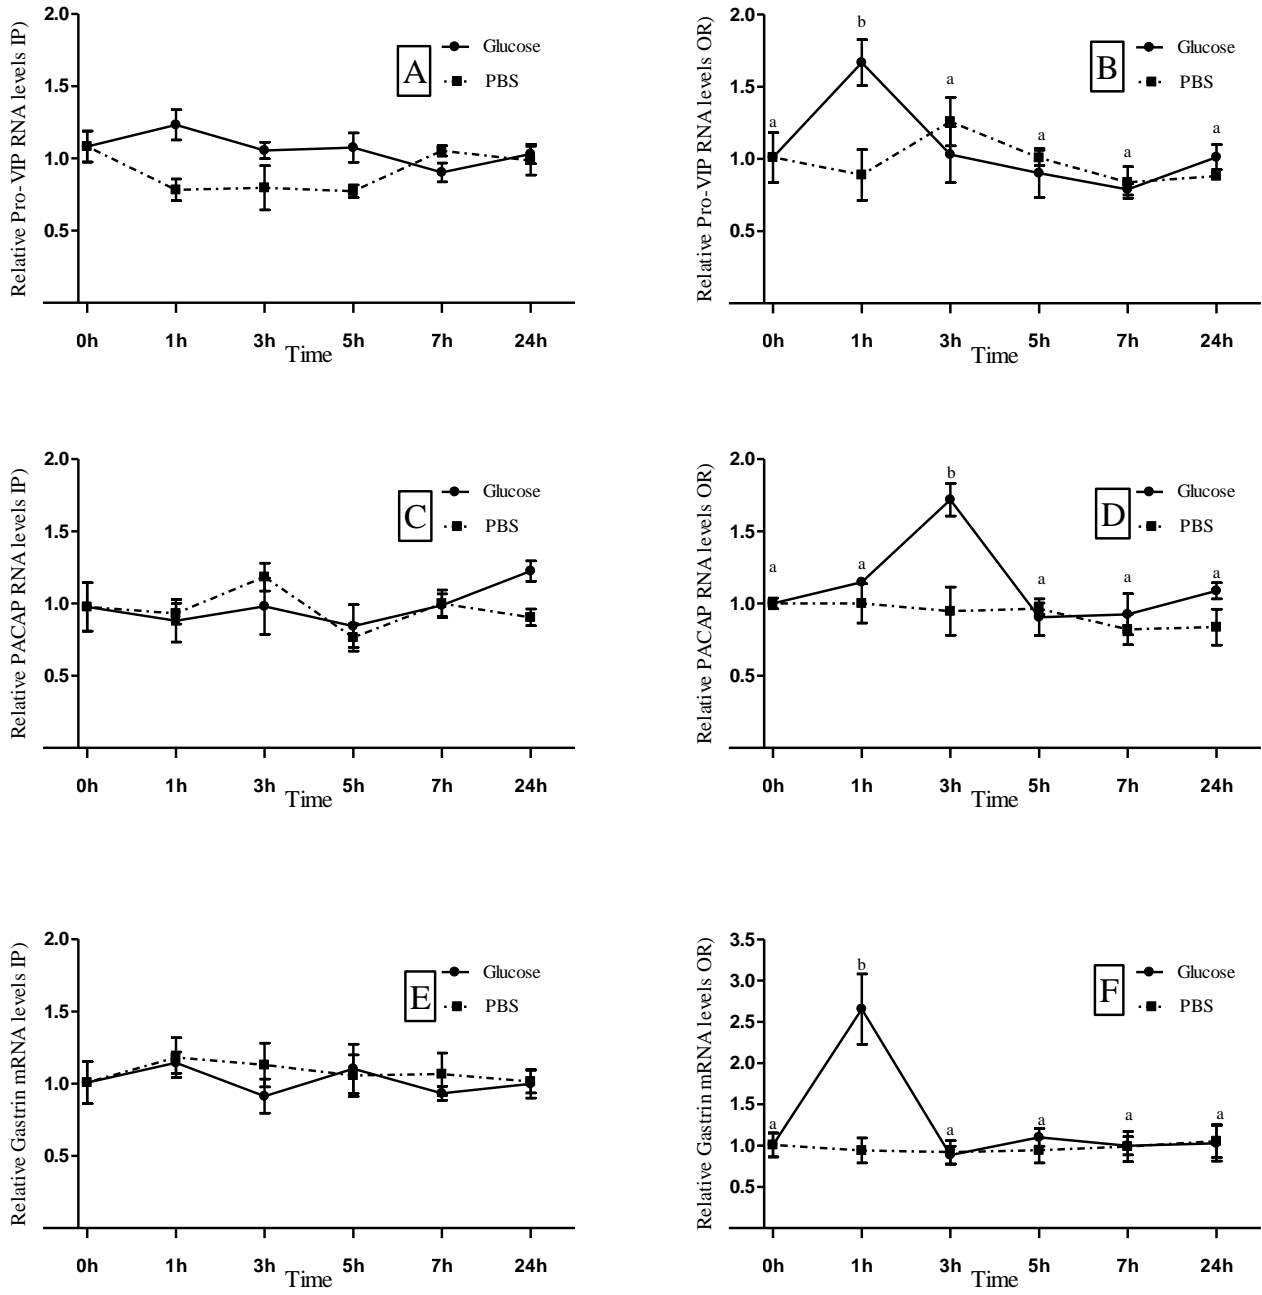

764

765

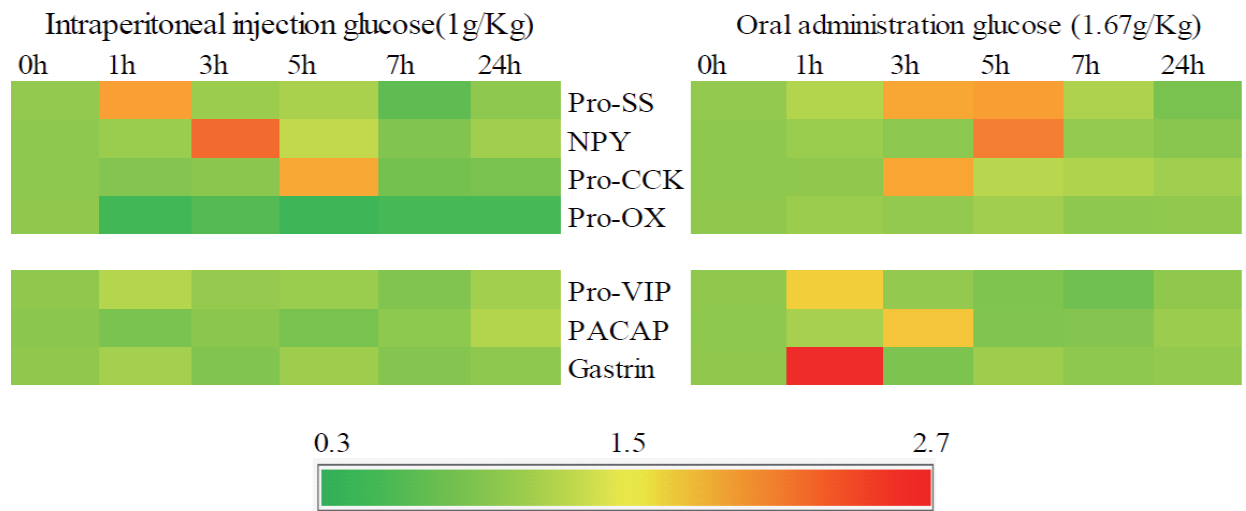

766 **Figure 6**

767

768

769 **Figure 7**

770

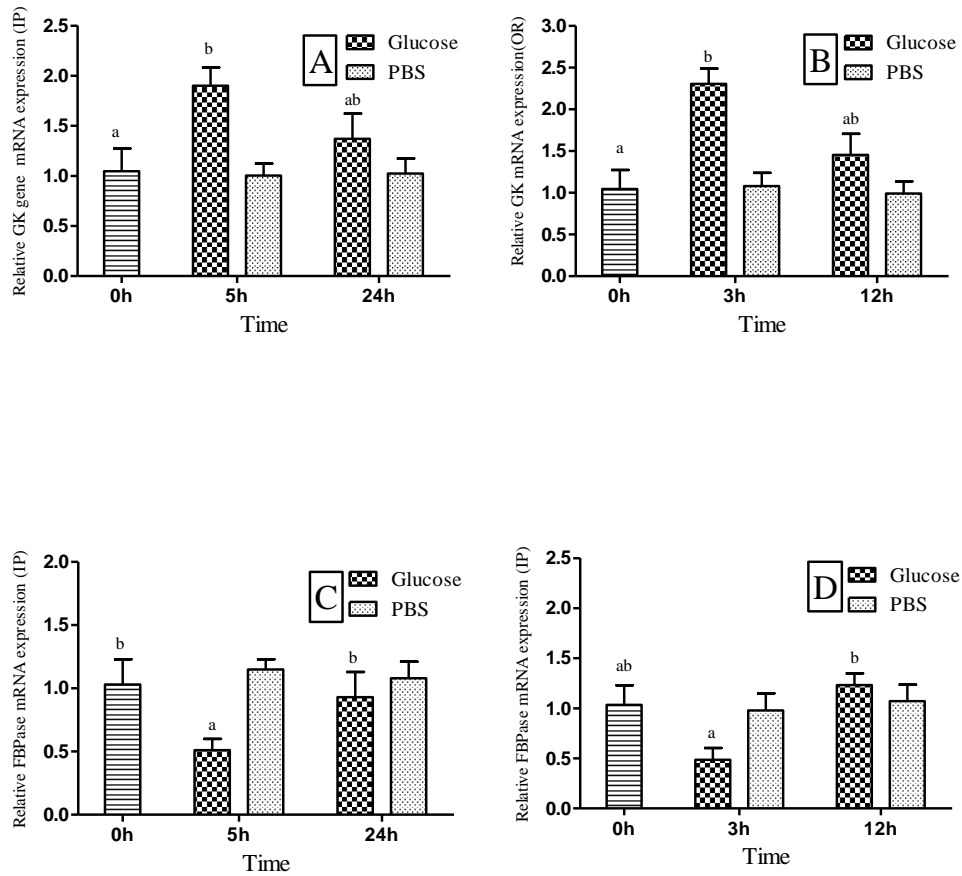

771

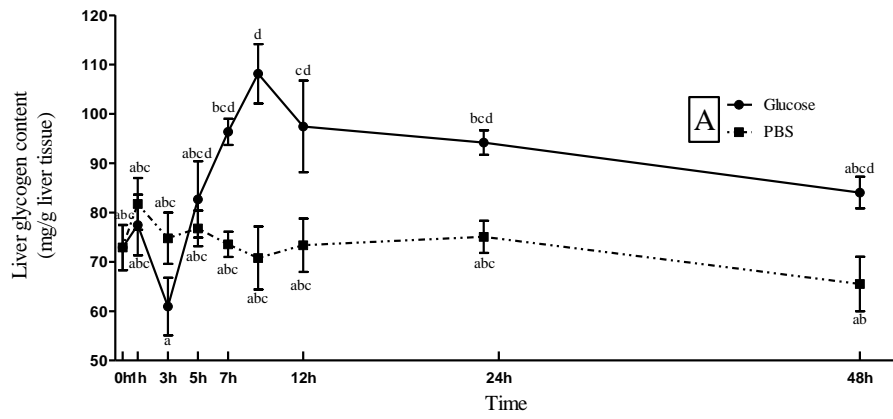

772

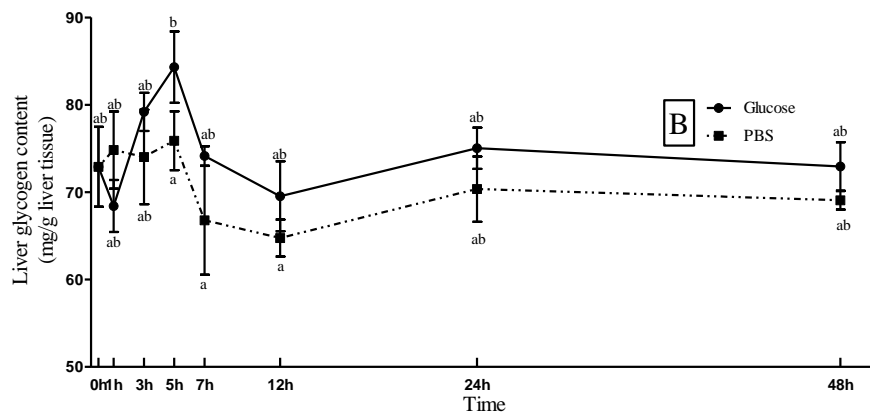

773

774 **Figure 8**

775

776

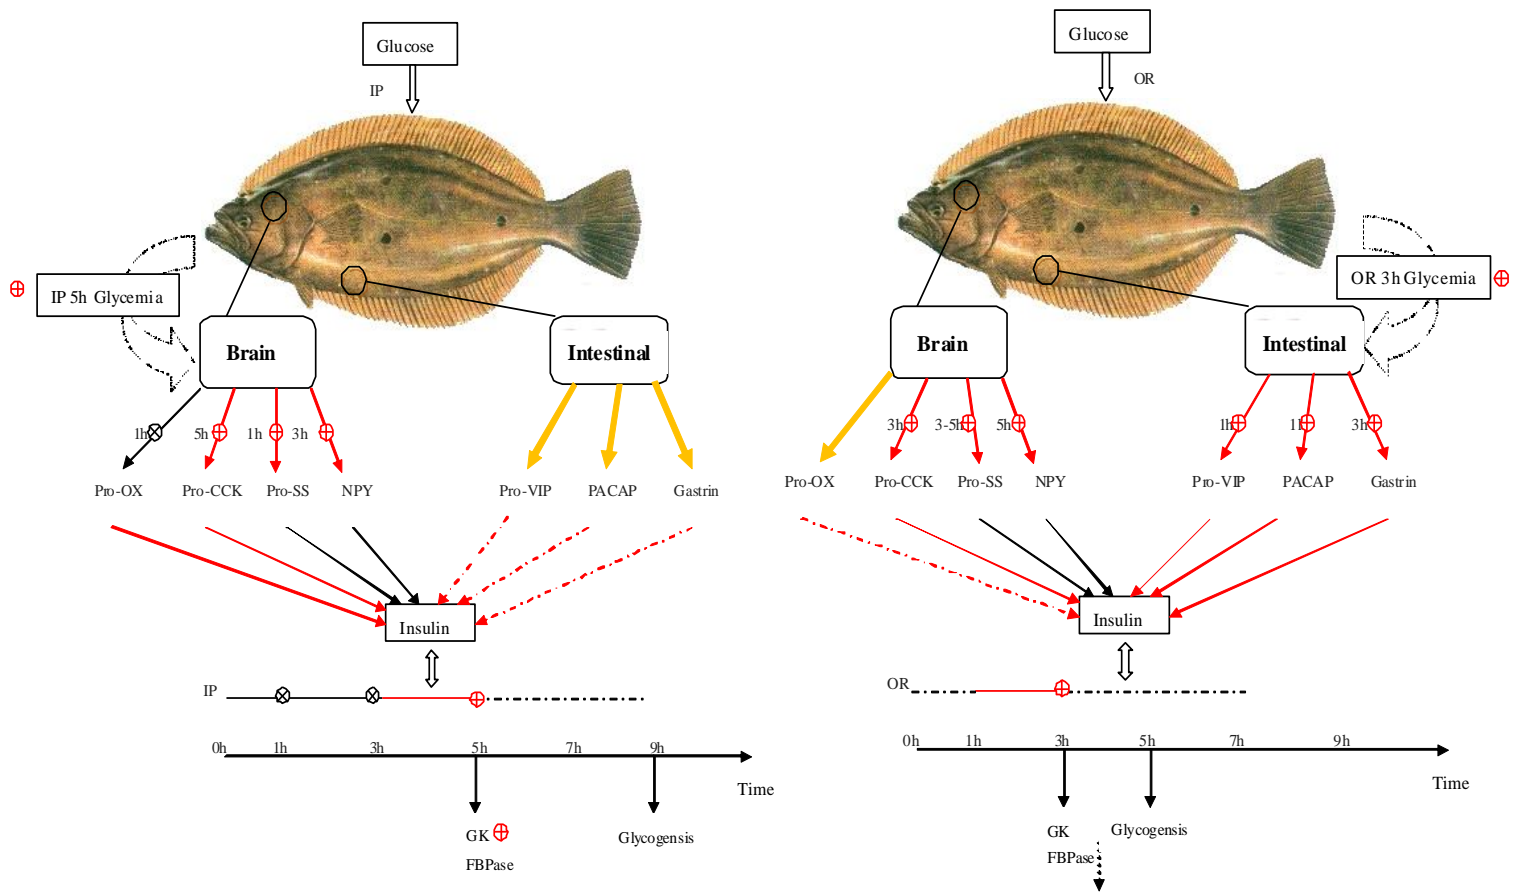

777 **Figure 9**

778

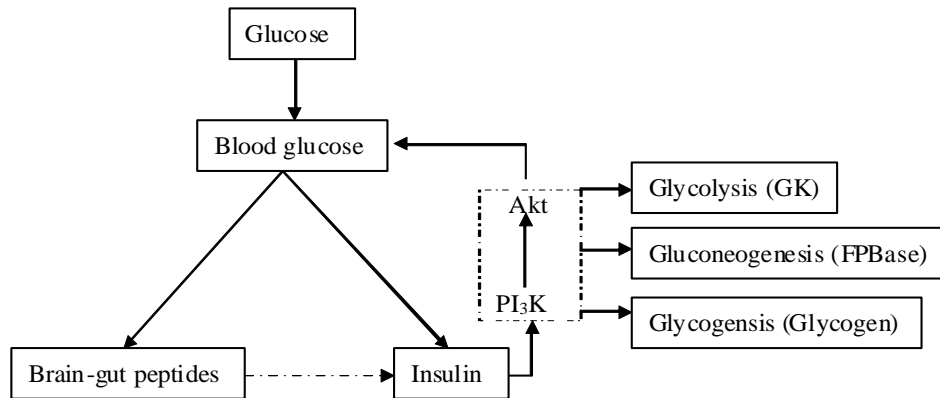

779

780 **Figure 10**
